# Supplementary material for: Step width variability as a discriminator of age-related gait changes
Source: Springer Nature journal article supplement (doi:10.1186/s12984-020-00671-9), 2020-03-05
Supplement: MOESM2 [file 17774504]

**Additional Table 1.** Full search string. PubMed database from inception to September 2018. The next steps were followed for the systematic literature review: i) Found MeSH words in PubMed; ii) Created query in PubMed; iii) Used given query's combinations to search databases (see Figure, Supplemental Figure S1).

| Query |
|-------|
|-------|

|                                                                                                                                                                                                                                   |
|-----------------------------------------------------------------------------------------------------------------------------------------------------------------------------------------------------------------------------------|
| (((((("Gait"[Mesh] OR "Walking"[Mesh]) AND "Aged"[Mesh]) OR "Aged, 80 and over"[Mesh]) OR "Healthy Aging"[Mesh] AND "Young Adult"[Mesh]) OR "Adult"[Mesh]) AND step[All Fields] AND width[All Fields] AND variability[All Fields] |
|-----------------------------------------------------------------------------------------------------------------------------------------------------------------------------------------------------------------------------------|
