# Supplementary material for: Step width variability as a discriminator of age-related gait changes
Source: Springer Nature journal article supplement (doi:10.1186/s12984-020-00671-9), 2020-03-05
Supplement: MOESM3 [file 17774504]

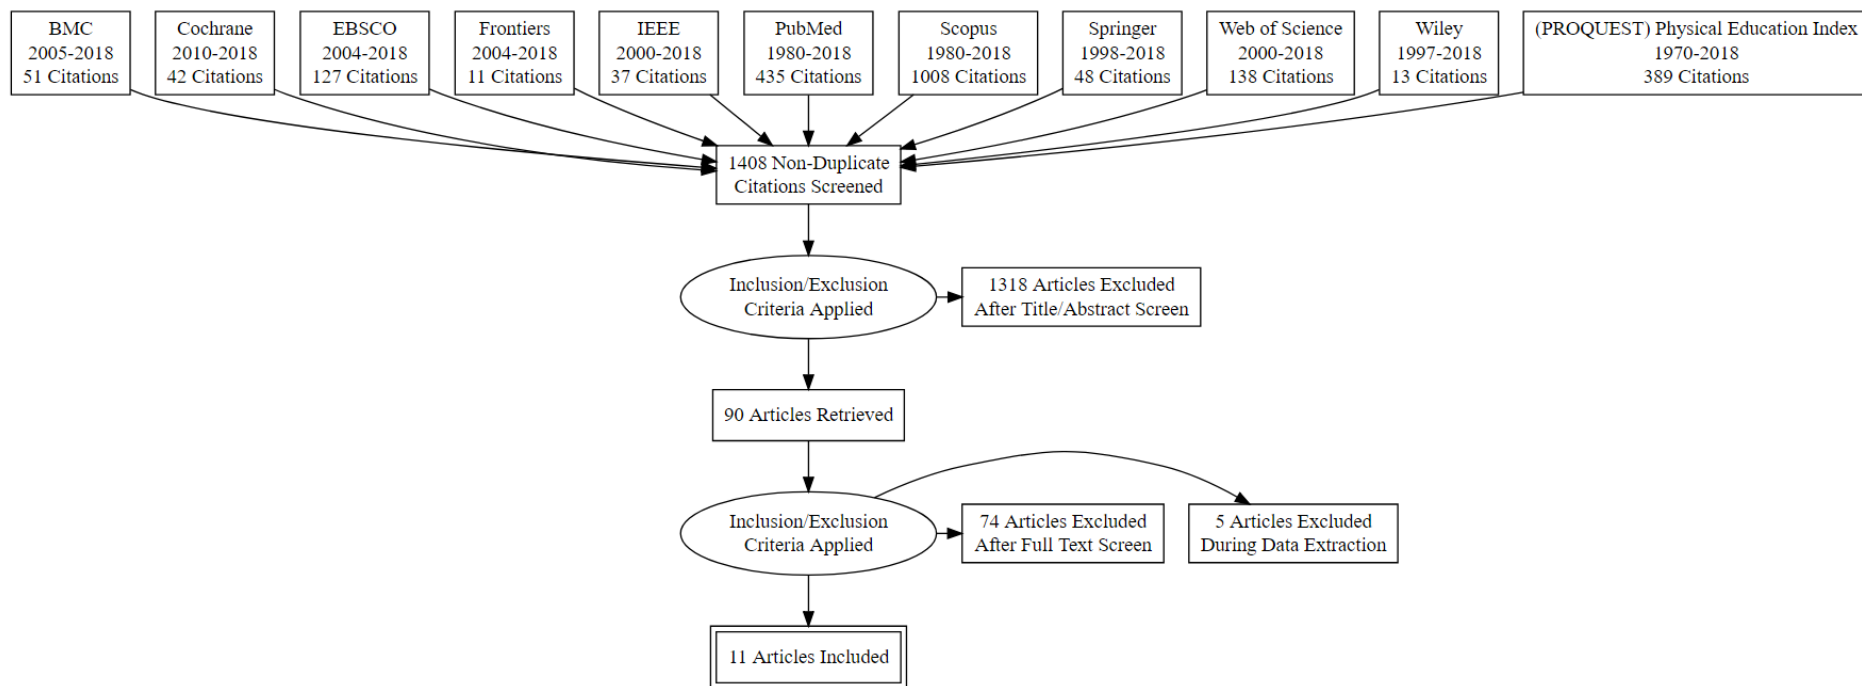

**Additional Figure 1:** Detailed flow diagram of literature search and selection of studies
