# Supplementary material for: Step width variability as a discriminator of age-related gait changes
Source: Springer Nature journal article supplement (doi:10.1186/s12984-020-00671-9), 2020-03-05
Supplement: MOESM4 [file 17774504]

### Gaussian Mixture Model

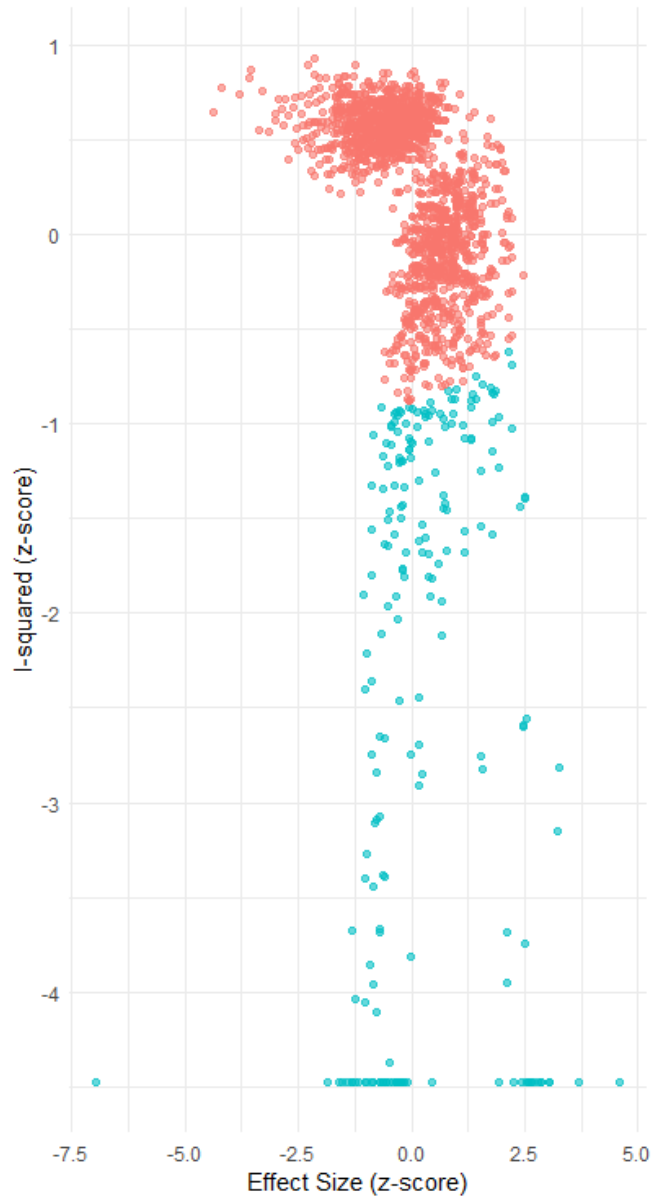

### Cluster imbalance (GMM)

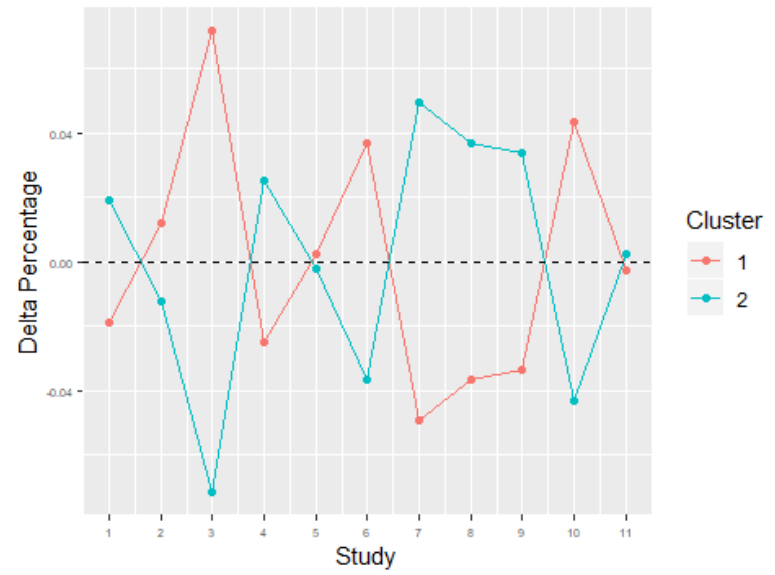

### Cluster imbalance (Cook's Distance)

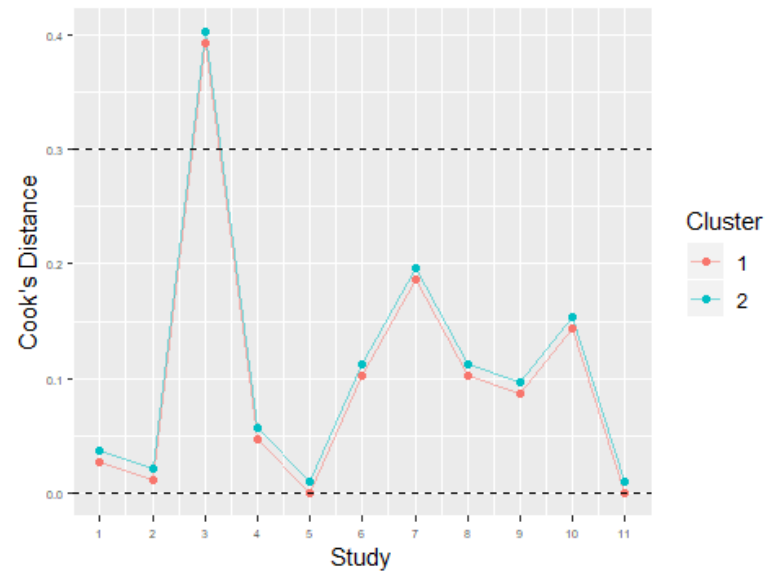

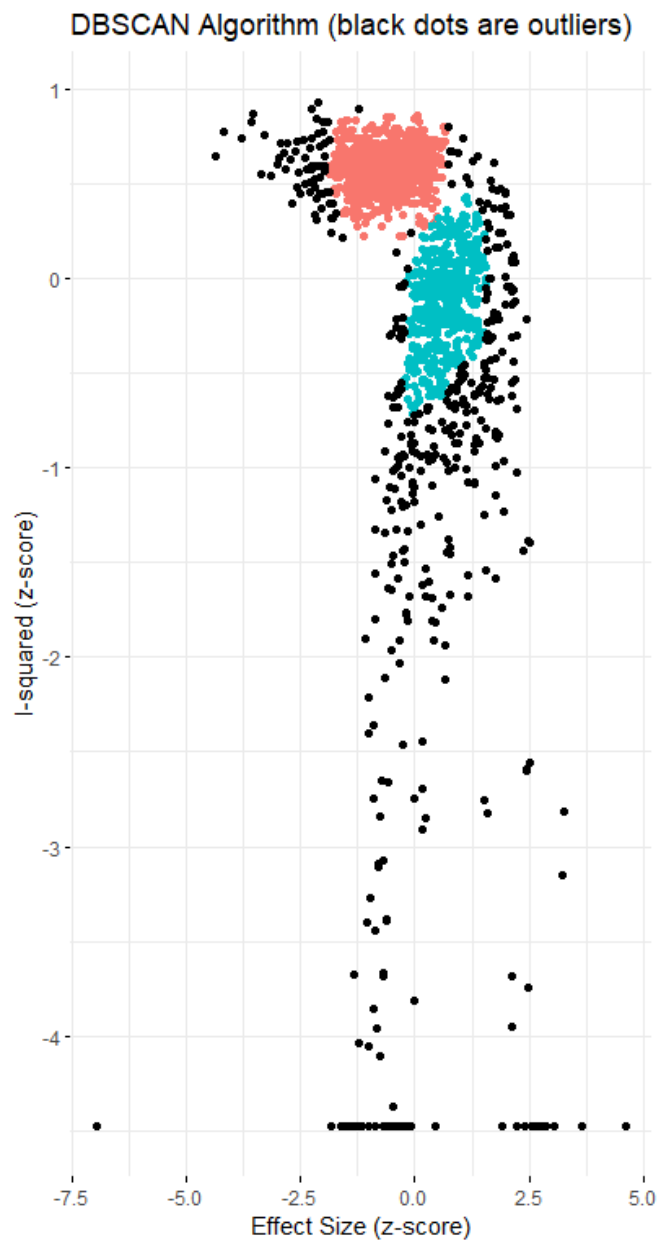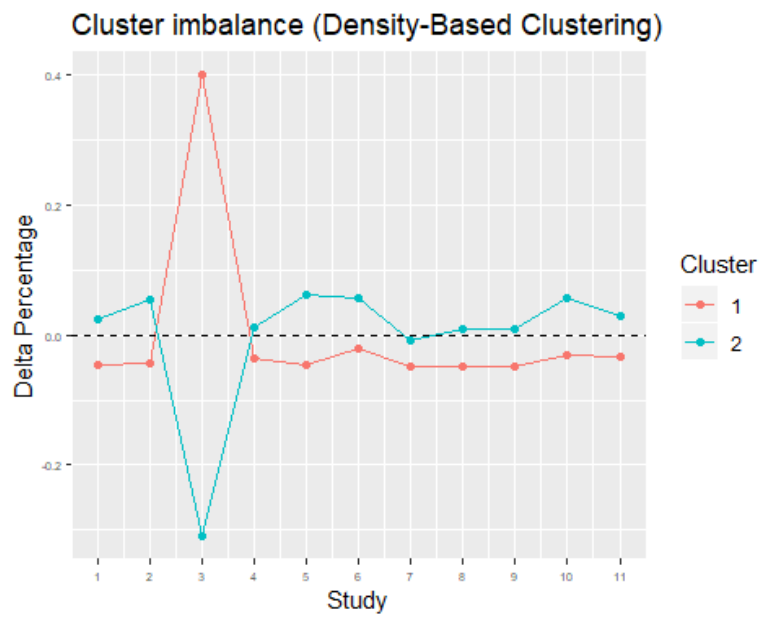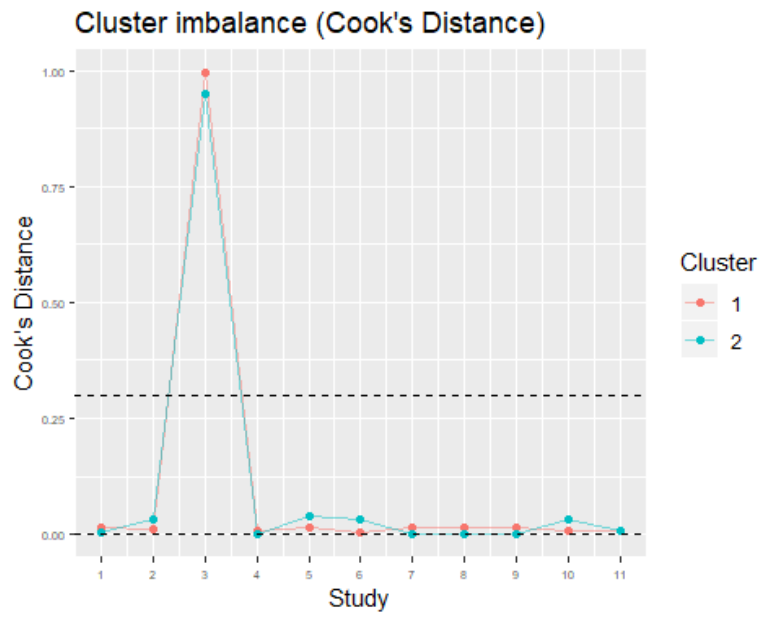

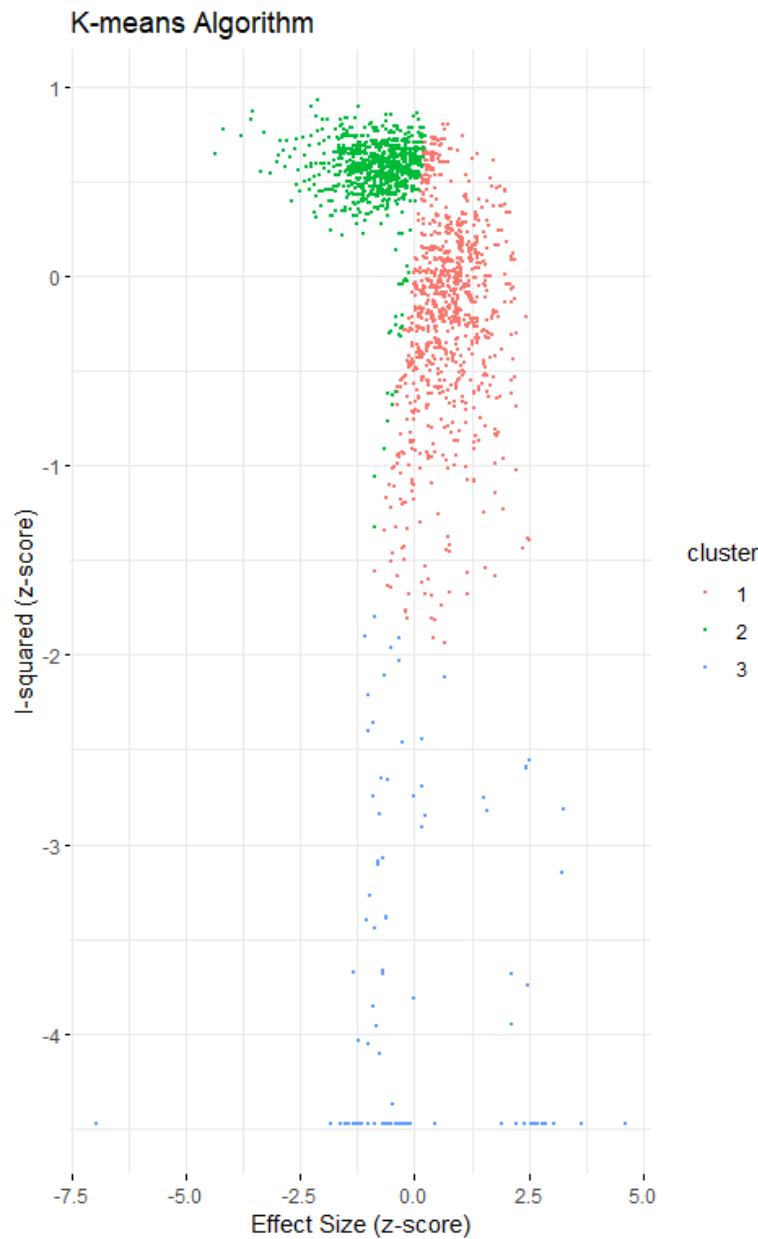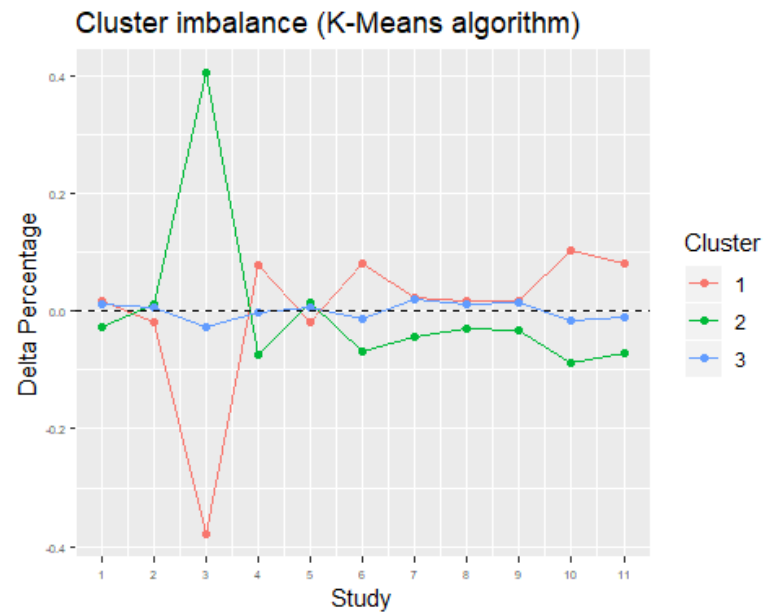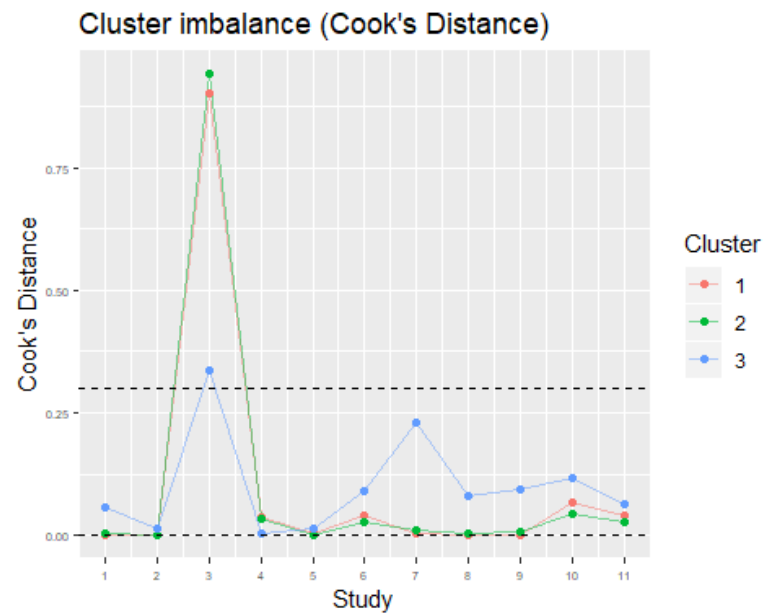

**Additional Figures 1-3:** To explore the patterns of the pooled effect sizes and heterogeneity we used the GOSH plot. The GOSH plot displays the pooled effect sizes of every possible subset ( $2^{10}-1$ ) of the included studies in the meta-analysis against  $I^2$ . Three clustering algorithms (k-means, DBSCAN and the Gaussian Mixture Model) was used to detect clusters in the GOSH plot data and determine which of the studies contribute the most to the cluster imbalance.

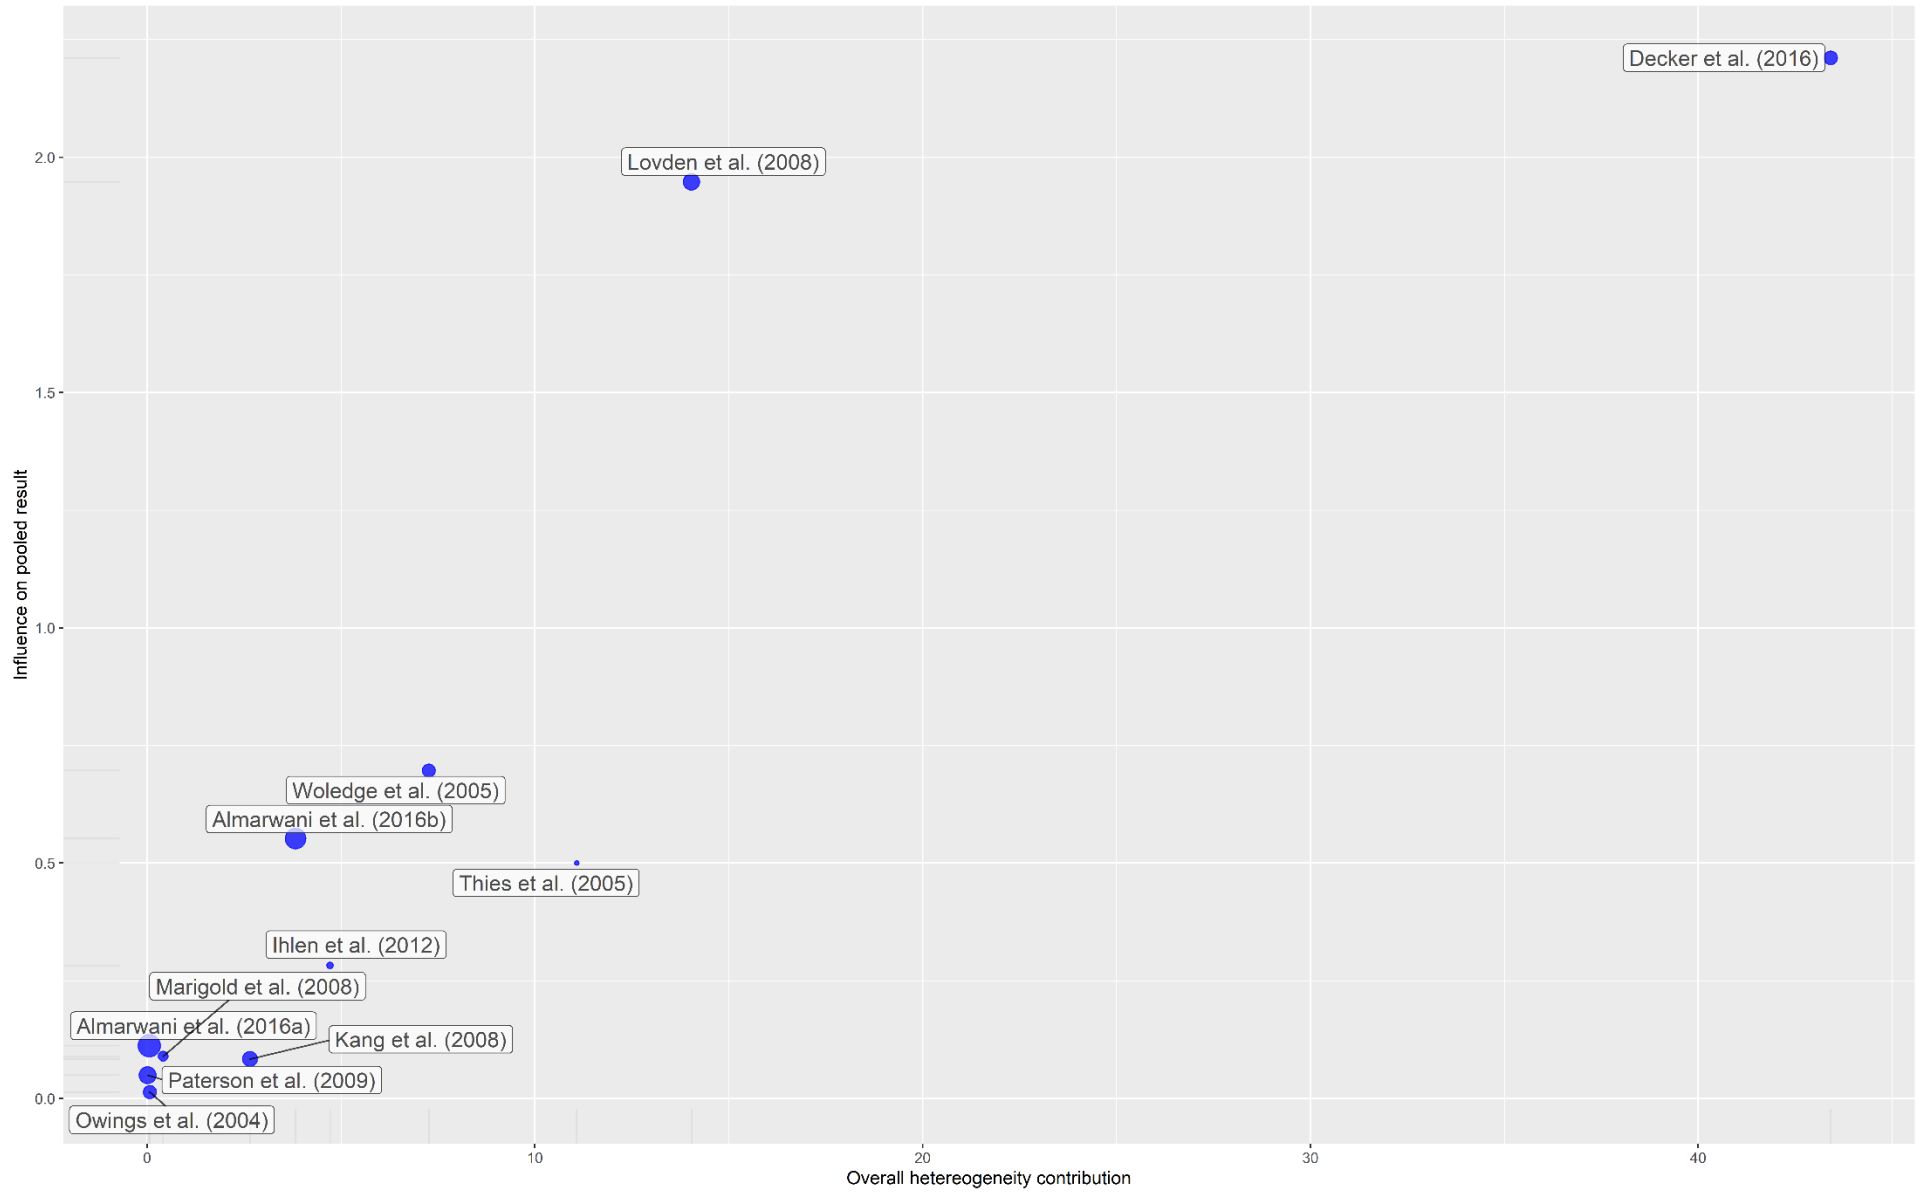

**Additional Figure 4:** Baujat plot showing the influence of each study on the overall Q statistic on the horizontal axis and its influence on the pooled effect size on the vertical axis

**Additional Table 1.** Heterogeneity sensitivity analysis. The leave-one-out-method recalculates the results of the meta-analysis by omitting one study at time.

| Study | Author                            | ES   | 95% CI |      | $I^2$ | rstudent | DFFITS | cook.d | cov.r | $\tau^2$ | QE.del | hat  | weight | infl       |
|-------|-----------------------------------|------|--------|------|-------|----------|--------|--------|-------|----------|--------|------|--------|------------|
| 1     | Omitting Almarwani et al. (2016a) | 0.92 | 0.07   | 1.76 | 0.89  | -0.11    | -0.06  | 0.01   | 1.43  | 1.07     | 87.47  | 0.10 | 10.23  | no         |
| 2     | Omitting Almarwani et al. (2016b) | 0.96 | 0.14   | 1.79 | 0.88  | -0.61    | -0.22  | 0.06   | 1.30  | 0.96     | 82.83  | 0.10 | 10.10  | no         |
| 3     | Omitting Decker et al. (2016)     | 1.11 | 0.58   | 1.64 | 0.76  | -3.80    | -1.05  | 0.58   | 0.58  | 0.36     | 41.14  | 0.09 | 9.12   | <b>yes</b> |
| 4     | Omitting Ihlen et al. (2012)      | 0.81 | 0.02   | 1.61 | 0.88  | 1.04     | 0.30   | 0.09   | 1.07  | 0.79     | 82.68  | 0.08 | 7.81   | no         |
| 5     | Omitting Kang et al. (2008)       | 0.97 | 0.15   | 1.79 | 0.89  | -0.73    | -0.24  | 0.06   | 1.18  | 0.87     | 84.66  | 0.09 | 9.39   | no         |
| 6     | Omitting Lovden et al. (2008)     | 0.79 | -0.01  | 1.58 | 0.86  | 1.14     | 0.38   | 0.14   | 1.03  | 0.74     | 71.98  | 0.10 | 9.60   | no         |
| 7     | Omitting Marigold et al. (2008)   | 0.89 | 0.06   | 1.72 | 0.89  | 0.16     | 0.04   | 0.00   | 1.15  | 0.85     | 87.11  | 0.08 | 8.31   | no         |
| 8     | Omitting Owings et al. (2004)     | 0.92 | 0.09   | 1.76 | 0.89  | -0.26    | -0.09  | 0.01   | 1.19  | 0.88     | 87.47  | 0.09 | 9.04   | no         |
| 9     | Omitting Paterson et al. (2009)   | 0.91 | 0.07   | 1.75 | 0.89  | -0.12    | -0.06  | 0.00   | 1.26  | 0.93     | 87.53  | 0.10 | 9.69   | no         |
| 10    | Omitting Thies et al. (2005)      | 0.76 | 0.02   | 1.50 | 0.87  | 1.76     | 0.51   | 0.24   | 0.99  | 0.72     | 76.13  | 0.08 | 7.70   | no         |
| 11    | Omitting Woledge et al. (2005)    | 0.81 | 0.00   | 1.61 | 0.88  | 0.97     | 0.31   | 0.09   | 1.09  | 0.79     | 79.82  | 0.09 | 9.01   | no         |

*Notes:* **ES** = effect size; **95% CI** = 95% confidence interval; **rstudent** = externally standardized residuals; **cook.d** = Cook's distances; **cov.r** = covariance ratios;  **$I^2$** ,  **$\tau^2$**  = leave-one-out estimates of the amount of heterogeneity; **QE.del** = leave-one-out values of the test statistics for heterogeneity; **hat** = hat values; **inf** = influential study.
